# Supplementary material
Source: Springer Nature journal article supplement (https://www.springermedizin.de/resource/supplementary/12879_2009_871_MOESM1_ESM.pdf/9449540)
Supplement: MOESM1 [file 9449540]

Potentially relevant references identified and screened  
(n =397)

Excluded by review of abstract: did not fulfill inclusion/exclusion criteria  
(n = 373)

Full articles retrieved for detailed evaluation  
(n =24)

Excluded (*n* = 18)  
Absence of placebo/no-treatment group: 15  
Allocation not randomized:0  
Polyclonal or monoclonal antibody given as treatment rather than prophylaxis: 1  
Population does not consist of infants and young children under 48 months of age:0  
Duplicate publication:2

Studies included in meta-analysis  
(*n* = 6)
